# Supplementary material for: Effects of Prior Infection with SARS-CoV-2 on B Cell Receptor Repertoire Response during Vaccination
Source: MDPI journal article supplement (doi:10.3390/vaccines10091477), 2022-09-06
Supplement: s1 [file s1]

**SUPPLEMENTAL INFORMATION**

**Effects of prior infection with SARS-CoV-2 on B cell receptor repertoire response during vaccination.**

Elizabeth R. Fraley, Santosh Khanal, Stephen H. Pierce, Cas A. LeMaster, Rebecca McLennan, Tomi Pastinen, and Todd Bradley

**Table of contents**

|                                                                                                       |        |
|-------------------------------------------------------------------------------------------------------|--------|
| Figure S1: V gene usage, HCDR3 length distribution, and SHM of the IgM portion of the BCR repertoire. | Page 2 |
| Figure S2: V gene usage, HCDR3 length distribution, and SHM of the IgA portion of the BCR repertoire. | Page 3 |
| Figure S3. Distribution of most numerous clones by clonal frequency.                                  | Page 4 |
| Figure S4: HCDR3 length distribution of top 50 IgG clones by serotype.                                | Page 5 |
| Table S1: Read depth and number of total clones.                                                      | Page 6 |
| Table S2: Top 50 clones by time point.                                                                | Page 7 |

**SUPPLEMENTAL FIGURES**

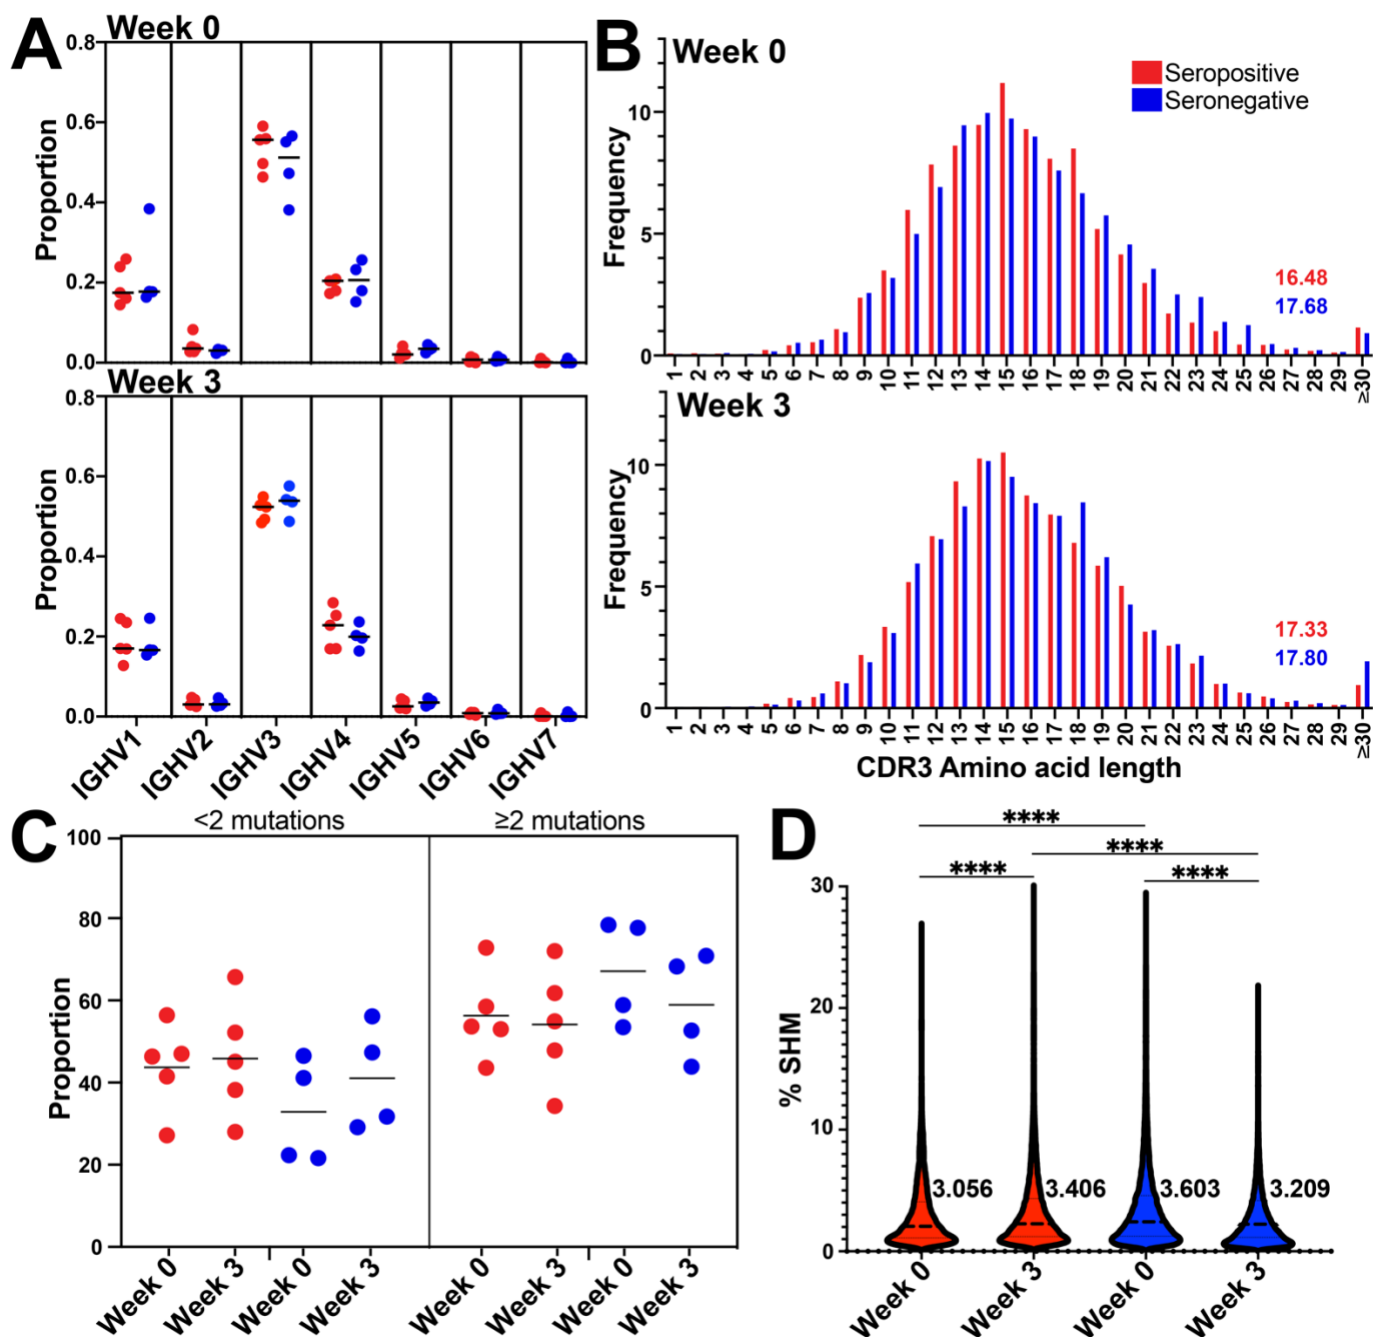

**Figure S1: V gene usage, HCDR3 length distribution, and SHM of the IgM portion of the BCR repertoire.** (A) Heavy chain V gene usage (IGHV1-7) of IgM clones. Proportion as indicated for seropositive (red) and seronegative (blue). No significant differences were observed between serotypes at week 0 and week 3, and no changes within serotype over time were observed. (B) Distribution of heavy chain complementary determining region 3 (HCDR3) lengths of IgM clones for week 0 and week 3. Seropositive (red) and seronegative (blue) and mean HCDR3 length are shown. No significant changes in the distribution of HCDR3 lengths were seen between serotypes at either time point, or within serotype between weeks. (C) Plot depicting the proportion (0-100%) of IgM clones with less than 2 mutations (left) and greater than 2 mutations (right). There were no statistically significant differences in the proportions of seropositive (red) and seronegative (blue) at week 0 or week 3. (D) Violin plots depicting percent of SHM (%SHM) for IgM clonotypes in seropositive (red) and seronegative (blue) at weeks 0 and 3. Mean values for each violin are indicated on the plot and by strong dashed lines, quartiles are indicated by thin dashed lines. Statistical test performed was Welch's t-test, p value \*\*\*\*  $p < 0.0001$ .

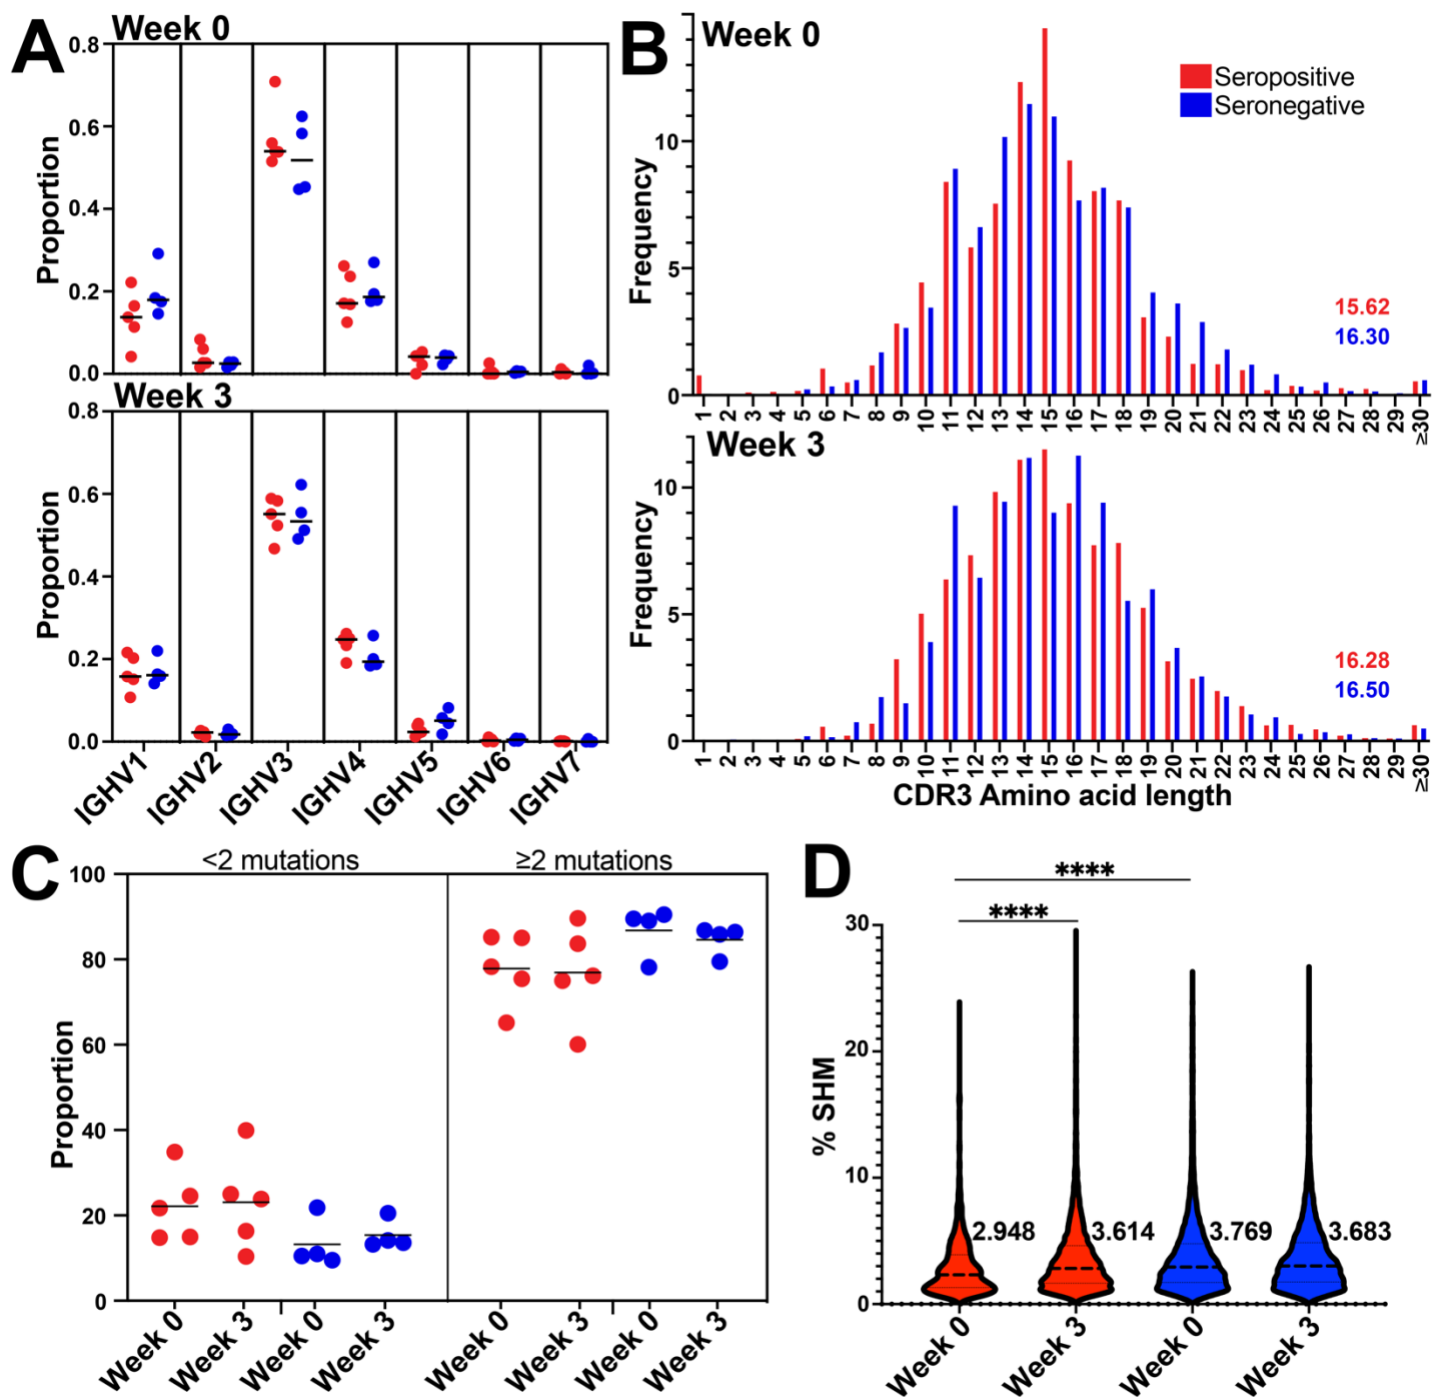

**Figure S2: V gene usage, HCDR3 length distribution, and SHM of the IgA portion of the BCR repertoire**

**(A)** Heavy chain V gene usage (IGHV1-7) of IgA clones. Proportion as indicated for seropositive (red) and seronegative (blue). No significant differences were observed between serotypes at week 0 and week 3, and no changes within serotype over time were observed. **(B)** Distribution of heavy chain complementary determining region 3 (HCDR3) lengths of IgA clones for week 0 and week 3. Seropositive (red) and seronegative (blue) and mean HCDR3 length are shown. No significant changes in the distribution of HCDR3 lengths were seen between serotypes at either time point, or within serotype between weeks. **(C)** Plot depicting the proportion (0-100%) of IgA clones with less than 2 mutations (left) and greater than 2 mutations (right). There were no statistically significant differences in the proportions of seropositive (red) and seronegative (blue) at week 0 or week 3. **(D)** Violin plots depicting percent of somatic hypermutation (%SHM) for IgA clonotypes in seropositive (red) and seronegative (blue) at weeks 0 and 3. Mean values for each violin are indicated on the plot and by strong dashed lines, quartiles are indicated by thin dashed lines. Statistical test performed was Welch's t-test, p value \*\*\*\*  $p < 0.0001$ .

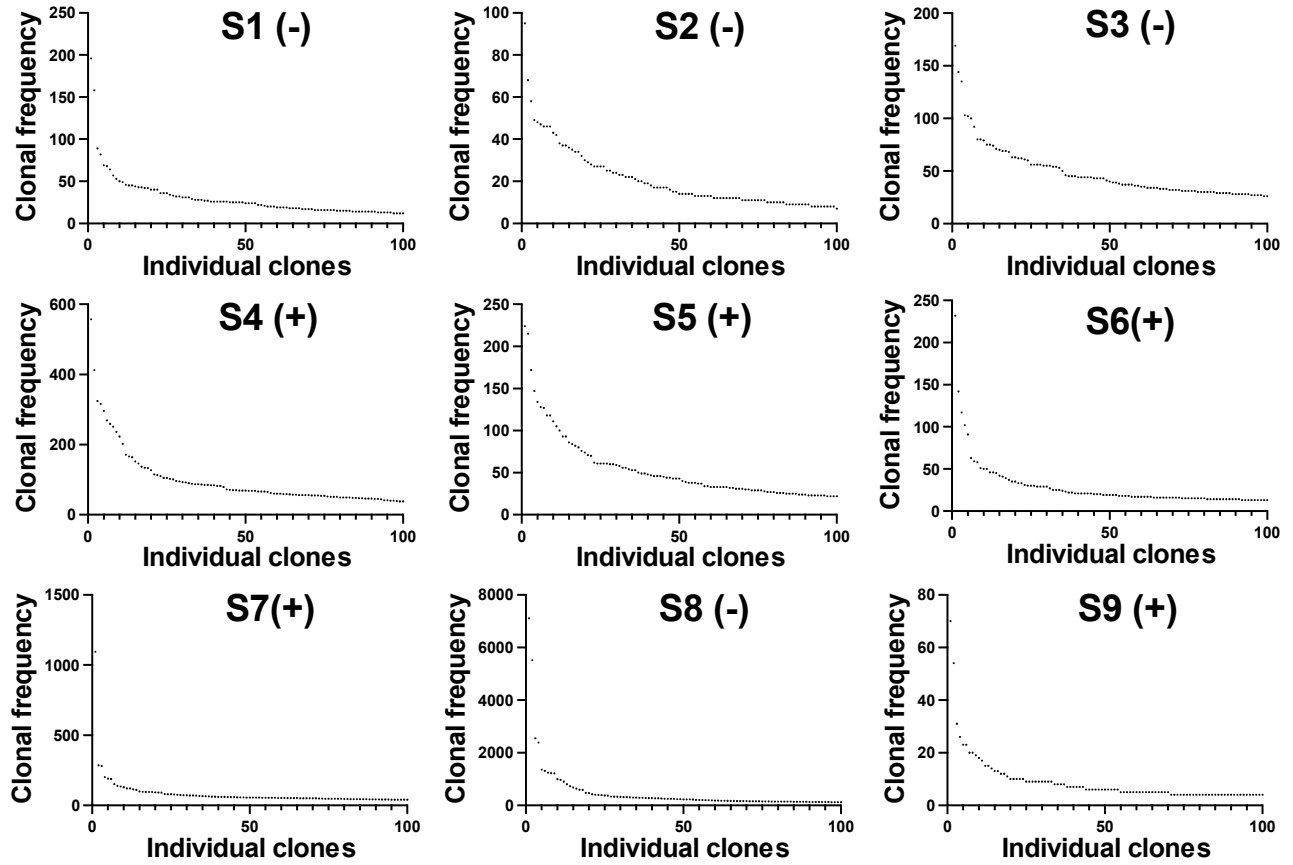

**Figure S3. Distribution of most numerous clones by clonal frequency.** Top 100 most numerous clones plotted in descending order by read number (clonal frequency) for each subject in this study (S1-9).

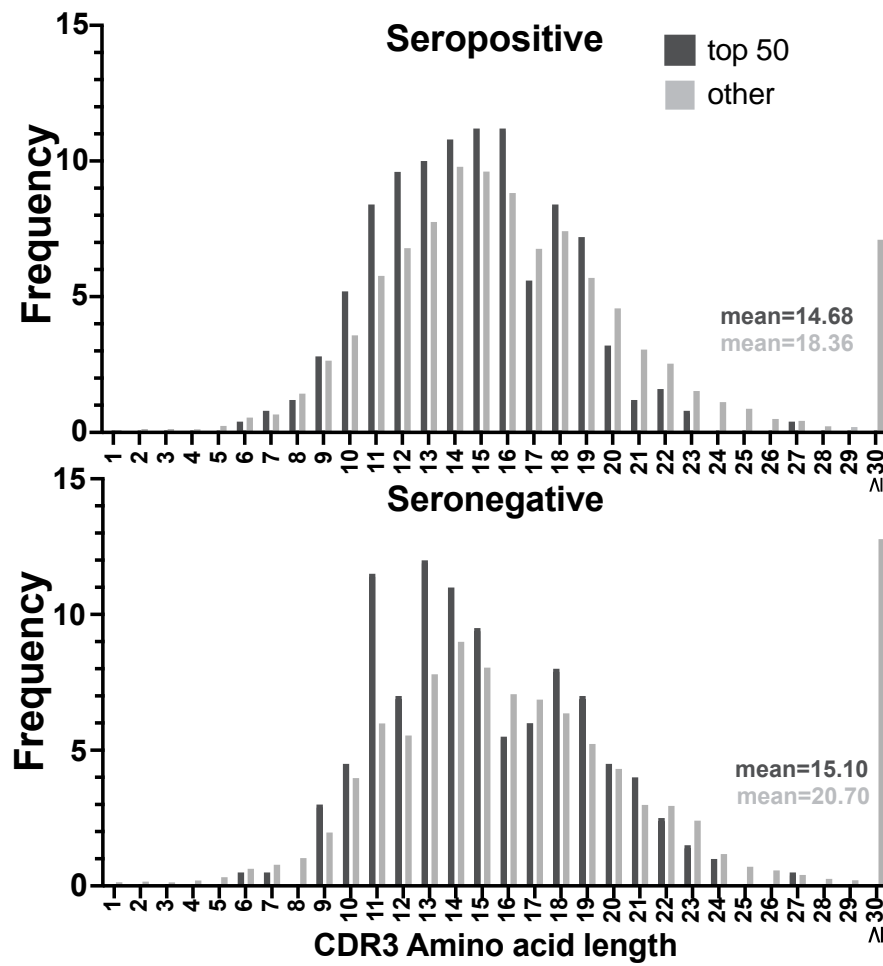

**Figure S4: HCDR3 length distribution of top 50 IgG clones by serotype.** HCDR3 length distribution of seropositive (top), and seronegative (bottom). Means are indicated for the top 50 (dark gray) and other (light gray). Kolmogorov-Smirnov test was performed, \*  $p=0.0354$ ).

## SUPPLEMENTAL TABLES

**Table S1. Read depth and number of total clones.**

|                  | # of reads<br>pre-QC | # of reads<br>post-QC | # of<br>unique<br>clones | Status       | RNA conc.<br>(ng) |
|------------------|----------------------|-----------------------|--------------------------|--------------|-------------------|
| sample 1, week 0 | 4320757              | 538707                | 66277                    | seronegative | 786               |
| sample 1, week 3 | 3031410              | 83141                 | 9282                     | seronegative | 1600              |
|                  |                      |                       |                          |              |                   |
| sample 2 week 0  | 1333079              | 83092                 | 11085                    | seronegative | 1600              |
| sample 2 week 3  | 3055257              | 160469                | 24433                    | seronegative | 1600              |
|                  |                      |                       |                          |              |                   |
| sample 3, week 0 | 1946747              | 70920                 | 7995                     | seronegative | 1600              |
| sample 3, week 3 | 3784400              | 196798                | 19786                    | seronegative | 1600              |
|                  |                      |                       |                          |              |                   |
| sample 4, week 0 | 4398520              | 75333                 | 3975                     | seropositive | 1112              |
| sample 4, week 3 | 4,102,982            | 276158                | 26116                    | seropositive | 1564              |
|                  |                      |                       |                          |              |                   |
| sample 5, week 0 | 863,397              | 75240                 | 688                      | seropositive | 1516              |
| sample 5, week 3 | 3,095,188            | 207393                | 26385                    | seropositive | 1600              |
|                  |                      |                       |                          |              |                   |
| sample 6, week 0 | 3537122              | 104344                | 10660                    | seropositive | 1600              |
| sample 6, week 3 | 3634992              | 333502                | 43888                    | seropositive | 1600              |
|                  |                      |                       |                          |              |                   |
| sample 7, week 0 | 4451395              | 194339                | 9409                     | seropositive | 1600              |
| sample 7, week 3 | 2,230,122            | 461031                | 58672                    | seropositive | 1600              |
|                  |                      |                       |                          |              |                   |
| sample 8, week 0 | 6001878              | 347447                | 24080                    | seronegative | 1204              |
| sample 8, week 3 | 3066931              | 447007                | 25337                    | seronegative | 1150              |
|                  |                      |                       |                          |              |                   |
| sample 9, week 0 | 940760               | 222153                | 32910                    | seropositive | 1600              |
| sample 9, week 3 | 1012370              | 54974                 | 8140                     | seropositive | 1600              |

**Supplemental Table S2. Number of expanded clones “top 50” present at each time point and percentage of overlap with other time points by sample.**

| sample   | # of clones | percentage | group                                                 |  |  |
|----------|-------------|------------|-------------------------------------------------------|--|--|
| sample 1 | 13          | 26         | top 50 at time point 1 present at time point 2        |  |  |
| -        | 4           | 8          | top 50 at time point 1 present at top 50 time point 2 |  |  |
|          | 14          | 28         | top 50 at time point 2 present at time point 1        |  |  |
|          |             |            |                                                       |  |  |
| sample 2 | 6           | 12         | top 50 at time point 1 present at time point 2        |  |  |
| -        | 1           | 2          | top 50 at time point 1 present at top 50 time point 2 |  |  |
|          | 6           | 12         | top 50 at time point 2 present at time point 1        |  |  |
|          |             |            |                                                       |  |  |
| sample 3 | 12          | 24         | top 50 at time point 1 present at time point 2        |  |  |
| -        | 2           | 4          | top 50 at time point 1 present at top 50 time point 2 |  |  |
|          | 5           | 10         | top 50 at time point 2 present at time point 1        |  |  |
|          |             |            |                                                       |  |  |
| sample 4 | 11          | 22         | top 50 at time point 1 present at time point 2        |  |  |
| +        | 1           | 2          | top 50 at time point 1 present at top 50 time point 2 |  |  |
|          | 2           | 4          | top 50 at time point 2 present at time point 1        |  |  |
|          |             |            |                                                       |  |  |
| sample 5 | 17          | 34         | top 50 at time point 1 present at time point 2        |  |  |
| +        | 0           | 0          | top 50 at time point 1 present at top 50 time point 2 |  |  |
|          | 0           | 0          | top 50 at time point 2 present at time point 1        |  |  |
|          |             |            |                                                       |  |  |
| sample 6 | 14          | 28         | top 50 at time point 1 present at time point 2        |  |  |
| +        | 2           | 4          | top 50 at time point 1 present at top 50 time point 2 |  |  |
|          | 2           | 4          | top 50 at time point 2 present at time point 1        |  |  |
|          |             |            |                                                       |  |  |
| sample 7 | 15          | 30         | top 50 at time point 1 present at time point 2        |  |  |
| +        | 2           | 4          | top 50 at time point 1 present at top 50 time point 2 |  |  |
|          | 8           | 16         | top 50 at time point 2 present at time point 1        |  |  |
|          |             |            |                                                       |  |  |
| sample 8 | 32          | 64         | top 50 at time point 1 present at time point 2        |  |  |
| -        | 7           | 14         | top 50 at time point 1 present at top 50 time point 2 |  |  |
|          | 26          | 52         | top 50 at time point 2 present at time point 1        |  |  |
|          |             |            |                                                       |  |  |
| sample 9 | 11          | 22         | top 50 at time point 1 present at time point 2        |  |  |
| +        | 7           | 14         | top 50 at time point 1 present at top 50 time point 2 |  |  |
|          | 14          | 28         | top 50 at time point 2 present at time point 1        |  |  |
|          |             |            |                                                       |  |  |
